# Supplementary material for: Optimization of thermoelectric properties of carbon nanotube veils by defect engineering
Source: Royal Society of Chemistry journal article supplement (doi:10.1039/d3mh00525a), 2023-01-01
Supplement: d3mh00525a1.pdf [file d3mh00525a1.pdf]

## Supplementary Information

### Optimization of Thermoelectric Properties of Carbon Nanotube

#### Veils by Defect Engineering

*Chongyang Zeng*<sup>a,b</sup>, *Pietro Steiner*<sup>c,d</sup>, *Kan Chen*<sup>b</sup>, *Kening Wan*<sup>b</sup>, *Ming Dong*<sup>e</sup>, *Suwei Li*<sup>b</sup>,  
*Coskun Kocabas*<sup>c,d,f</sup>, *Michael J. Reece*<sup>b</sup>, *Dimitrios Papageorgiou*<sup>b</sup>, *Alexey N. Volkov*<sup>g</sup>, *Han*  
*Zhang*<sup>b</sup>, *Emiliano Bilotti*<sup>a\*</sup>

<sup>a</sup> Department of Aeronautics, Imperial College London, Exhibition Road, London, SW7 2AZ, UK.

<sup>b</sup> School of Engineering and Materials Science, Queen Mary University of London, London, E1 4NS, UK

<sup>c</sup> Department of Materials, University of Manchester, Manchester, M13 9PL, UK

<sup>d</sup> National Graphene Institute, University of Manchester, Manchester, M13 9PL, UK

<sup>e</sup> School of Physical and Chemical Sciences, Queen Mary University of London, London, E1 4NS, UK

<sup>f</sup> Henry Royce Institute for Advanced Materials, University of Manchester, Manchester, M13 9PL, U.K.

<sup>g</sup> Department of Mechanical Engineering, University of Alabama, 7th Avenue, Tuscaloosa, AL 35487, U.S.A.

\*Corresponding author: [e.bilotti@imperial.ac.uk](mailto:e.bilotti@imperial.ac.uk)

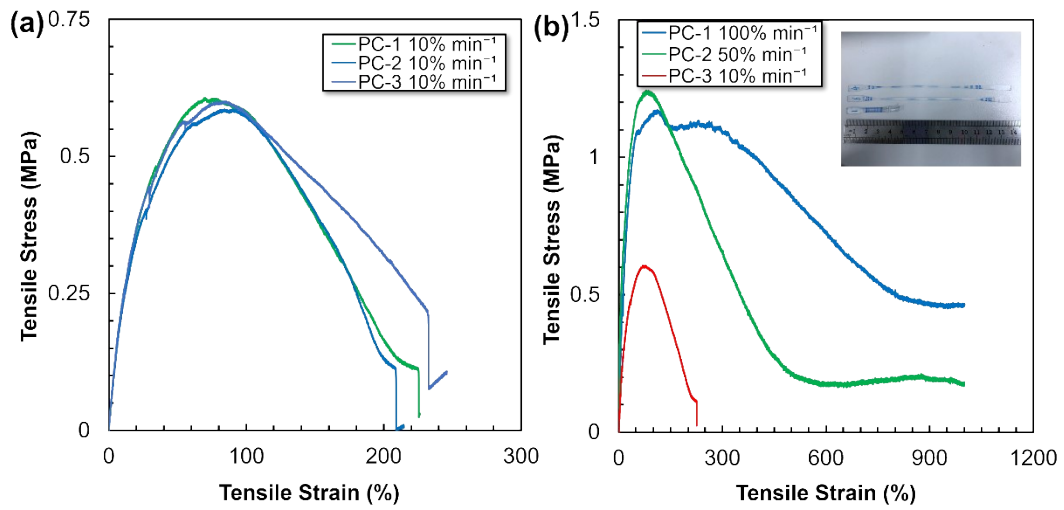

**Figure S1.** Mechanical properties of PC films at 160 °C with load speed of 10% min<sup>-1</sup> (a) and other speed (b). Stretched PC films with different load speed are inset in (b).

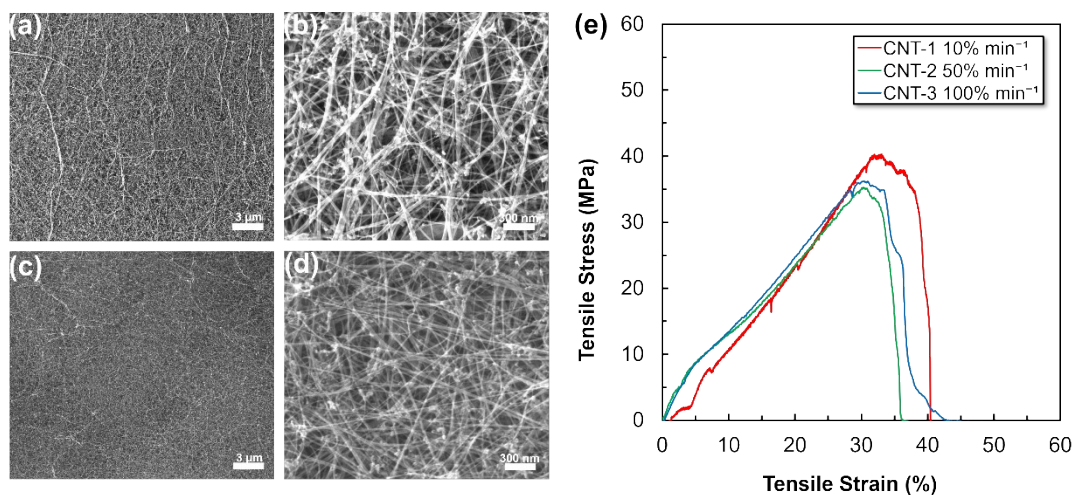

**Figure S2.** SEM images of CNT veils (a-d), surface (a-b) and bottom (c-d). Mechanical properties of CNT veils at 160 °C with different load speed (e). Scale bars are 3 μm and 300 nm, respectively.

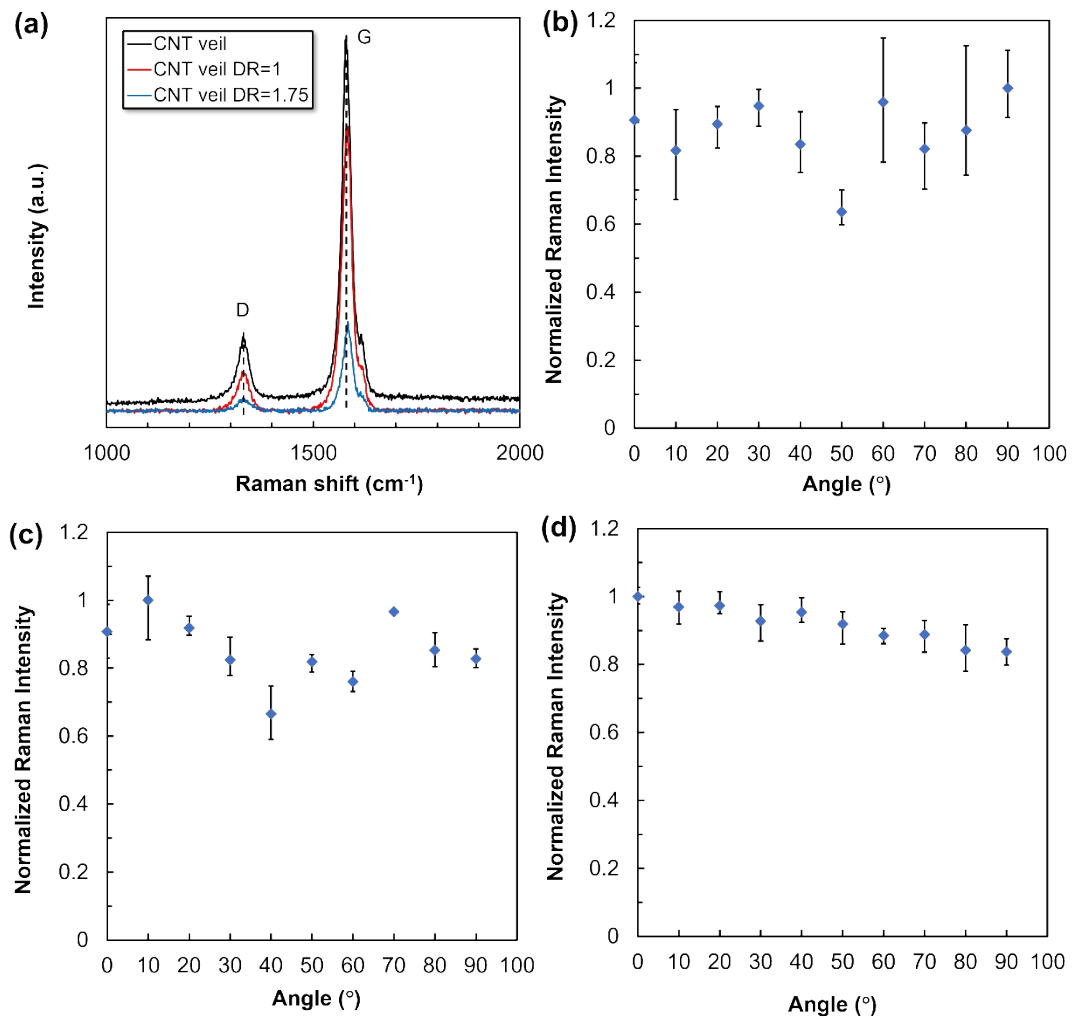

**Figure S3.** Raman spectra of CNT veils excited with a 633 nm laser (a) and normalized Raman intensity of the G-band for: pure CNT veil (b), PC/CNT/PC of DR = 1 after dissolving PC layer (c) and stretched PC/CNT/PC of DR = 1.75 after dissolving PC layer (d).

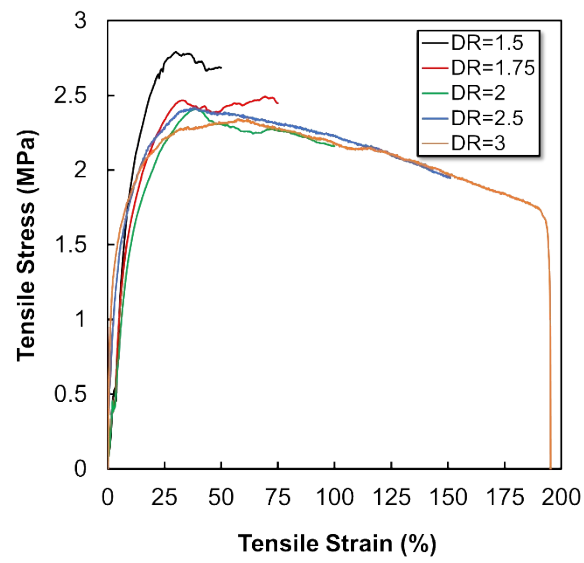

**Figure S4.** Mechanical properties of PC/CNT/PC with different draw ratios.

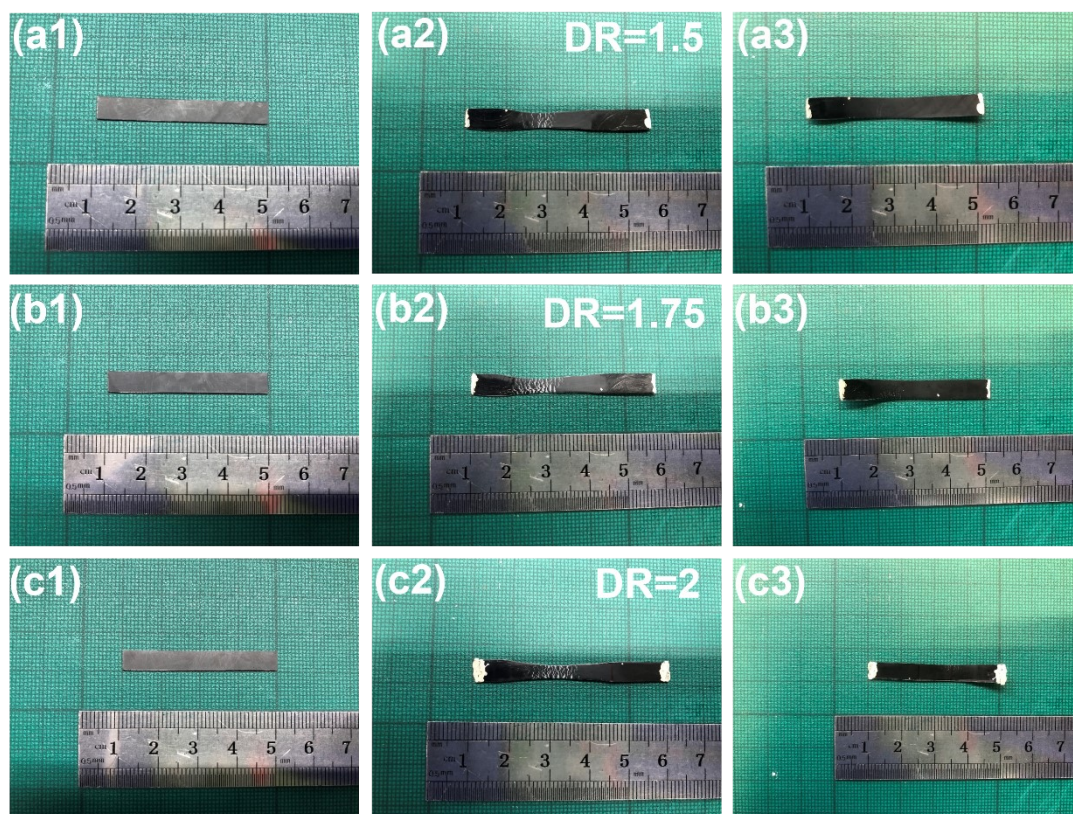

**Figure S5.** Digital photos of PC/CNT/PC composites at initial, stretched and heat-repaired states with different DR. DR = 1.5 (a1-a3), 1.75 (b1-b3) and 2 (c1-c3).

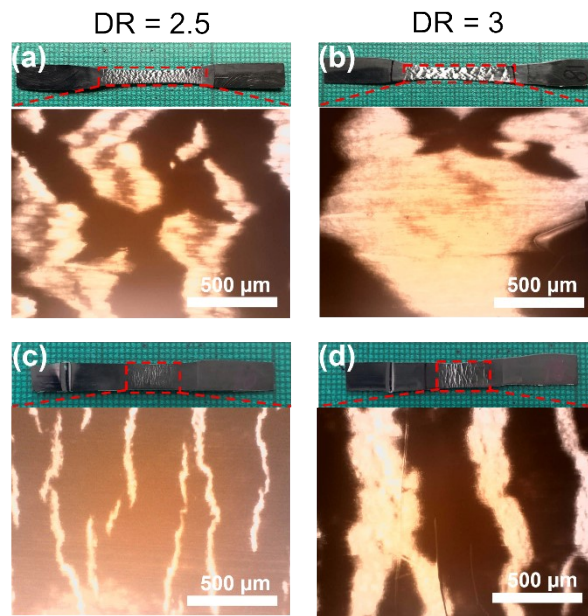

**Figure S6.** Digital photos and microscope images of stretched (a-b) and heat-repaired PC/CNT/PC composites (c-d) with DR of 2.5 and 3. Scale bar is 500 μm.

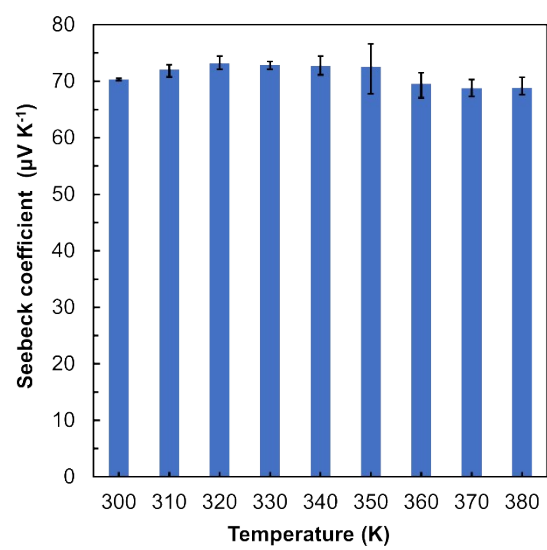

Figure S7 The dependence of the Seebeck coefficient of CNT veils on temperature.



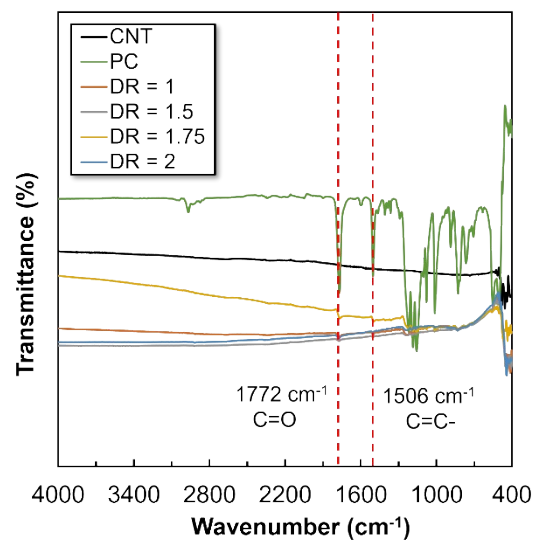

**Figure S8.** FTIR spectra of CNT veil, PC film and CNT veils after dissolving PC layer.

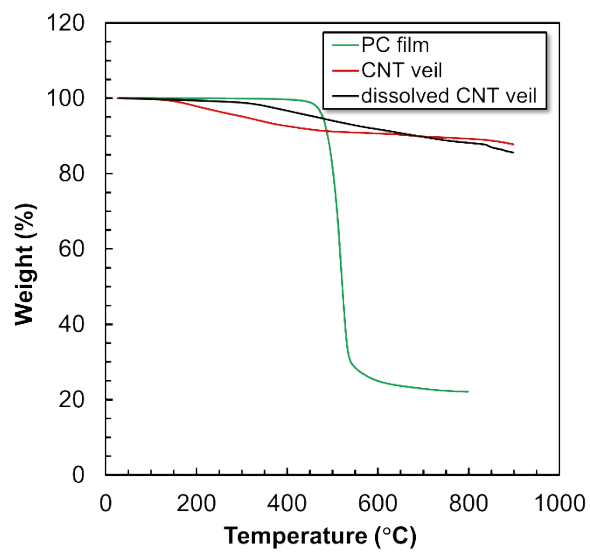

**Figure S9.** TGA results of PC film, CNT veil and CNT veil after dissolving PC layer.

### Note S1. Calculation the interfacial shear strength

The apparent shear strength at the fiber-matrix interface ( $\tau$ ) is given as follows:<sup>1</sup>

$$\tau = \frac{\sigma_f d}{2l_c} \quad (1)$$

From this equation,  $\sigma_f$  is the ultimate tensile strength of the fiber,  $d$  is the diameter of the fiber,  $l_c$  is the critical fiber length. In our case, CNT veil in the PC/CNT/PC composites is treated analogously to a continuous fiber. Hence, the interfacial shear strength can be estimated by this method. Here the force due to shear at the matrix/CNT veil interface and the force carried by the CNT veil are as follows,

$$F_1 = \tau \frac{l_c}{2} (2t + 2w) \quad (2)$$

$$F_2 = \sigma_{CNT} w t \quad (3)$$

Equating (2) and (3), we can obtain,

$$\tau \approx \frac{\sigma_{CNT} t}{l_c} \quad (4)$$

where  $t$  is the thickness of CNT veil,  $\sigma_{CNT}$  is the ultimate tensile strength of CNT veil,  $l_c$  is the critical length of CNT veil. According to the results of Fig. S2 and Fig. 3, the average  $\sigma_{CNT}$  and mean  $l_c$  are 37.2 MPa and 310  $\mu\text{m}$ , respectively and  $t$  is 3.6  $\mu\text{m}$ . Based on the relationship between critical length and the interfacial shear strength (Equation 4), the interfacial shear strength between the CNT veil and PC can be calculated as 0.43 MPa.

## Note S2-Calculation of thermal conductivity contributions

The in-plane electrical thermal conductivity for CNT film can be estimated on the basis of the Wiedemann-Franz law:<sup>2</sup>

$$\kappa_e = L_0 \times \sigma \times T \quad (5)$$

From this equation,  $\kappa_e$  is the electronic thermal conductivity,  $L_0$  is the Lorenz number of  $2.44 \times 10^{-8} \text{ W } \Omega^{-1} \text{ K}^{-2}$  (the Lorenz number dependent on materials and may not be applicable to the samples in this work),  $\sigma$  is the electrical conductivity of CNT veil and  $T$  is the temperature. Based on the equation, the calculated  $\kappa_e$  is  $0.64 \text{ W m}^{-1} \text{ K}^{-1}$ . Compare to the  $\kappa$  of the CNT veil ( $46 \text{ W m}^{-1} \text{ K}^{-1}$ ), the ratio of the electron to phonon contribution to the thermal conductivity is about 1 to 71, which suggests that the heat transport is dominated by the phonon component in the CNT veil.

Table S1. Hall measurements of the CNT veil

| Material | Hall coefficient<br>( $\text{cm}^3 \text{C}^{-1}$ ) | Carrier density<br>( $\text{cm}^{-3}$ ) | Carrier mobility<br>( $\text{cm}^2 \text{V}^{-1} \text{s}^{-1}$ ) |
|----------|-----------------------------------------------------|-----------------------------------------|-------------------------------------------------------------------|
| CNT veil | $2.27 \times 10^{-3}$                               | $3.17 \times 10^{21}$                   | 1.89                                                              |

**Table S2.** Raw data and normalized data of six performance indexes for CNT veil and composites.

| Name                                          | CNT veil after removing PC layer |        | Composites     |            |               |             |
|-----------------------------------------------|----------------------------------|--------|----------------|------------|---------------|-------------|
|                                               |                                  |        | Parallel model |            | Series model  |             |
| DR                                            | 1                                | 1.5    | 1              | 1.5        | 1             | 1.5         |
| $\sigma$ (S cm <sup>-1</sup> )                | <u>289</u>                       | 214    | <u>289</u>     | 214        | <u>289</u>    | 214         |
| S ( $\mu$ V K <sup>-1</sup> )                 | <u>55</u>                        | 54     | <u>55</u>      | 54         | <u>55</u>     | 54          |
| $\kappa$ (W m <sup>-1</sup> K <sup>-1</sup> ) | 46                               | 13     | 1.63           | 0.68       | <u>0.34</u>   | <u>0.34</u> |
| 1/ $\kappa$ (m K W <sup>-1</sup> )            | 0.0216                           | 0.0778 | 0.6119         | 1.4608     | <u>2.9662</u> | 2.9678      |
| ZT                                            | 0.0006                           | 0.0015 | 0.0158         | 0.0273     | 0.0768        | 0.0554      |
| E (MPa)                                       | 144                              | /      | 745            | <u>854</u> | 745           | 854         |
| Max tensile stress (MPa)                      | 31.9                             | /      | <u>46.7</u>    | 44.8       | <u>46.7</u>   | 44.8        |

Normalized data (each physical property is divided by the maximum value achieved within this study – underlined above – to which the arbitrary value of 10 is assigned).

| Name        | CNT veil after removing PC layer |        | Composites     |      |              |      |
|-------------|----------------------------------|--------|----------------|------|--------------|------|
|             |                                  |        | Parallel model |      | Series model |      |
| DR          | 1                                | 1.5    | 1              | 1.5  | 1            | 1.5  |
| $\sigma$    | 10                               | 7.4    | 10             | 7.4  | 10           | 7.4  |
| S           | 10                               | 9.87   | 10             | 9.87 | 10           | 9.87 |
| 1/ $\kappa$ | 0.0729                           | 0.2620 | 2.06           | 4.92 | 10           | 10   |
| ZT          | 0.0730                           | 0.1892 | 2.06           | 3.55 | 10           | 7.22 |
| E           | 1.68                             | /      | 8.72           | 10   | 8.72         | 10   |

---

|              |      |   |    |      |    |      |
|--------------|------|---|----|------|----|------|
| Max tensile  | 6.83 | / | 10 | 9.59 | 10 | 9.59 |
| stress (MPa) |      |   |    |      |    |      |

---

## References

1. O. Tadashi, A. Nakayama, M. Miwa and A. Hasegawa, *J. Appl. Polym. Sci.*, 1978, **22**, 3203-3212.
2. W.B. Zhou, Q.X. Fan, Q. Zhang, L. Cai, K. W. Li, X. G. Gu, F. Yang, N. Zhang, Y.C. Wang, H.P. Liu, W.Y. Zhou, S.S Xie, *Nat. commun.*, 2017, **8**, 14886.
